# Supplementary material
Source: Springer Nature journal article supplement (https://www.springermedizin.de/resource/supplementary/12883_2010_420_MOESM3_ESM.pdf/9455366)

**911 call received at  
the study site**

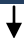

**Call screening by emergency  
medical dispatchers for study  
eligibility**

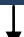

**Call interrogated using  
Card 28**

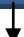

**Dispatch Determinant of Stroke  
(Yes/No)**

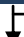

**Interrogation continued using  
Cincinnati Stroke Scale**

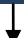

**Dispatch determinant of stroke  
assigned if score greater than 0**

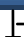

**Call completed**

**High Priority  
ambulance  
assignment if  
stroke**

**Upgrade ambulance  
assignment to high priority  
if new stroke identified**

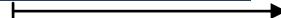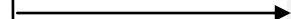

Supplement: MOESM3 [file 9455366]
